# Supplementary material for: Synthesis, Crystal Structure, and DFT Calculations of 1,3‐Diisobutyl Thiourea
Source: Hindawi journal article supplement (doi:10.1155/2015/913435), 2015-01-01
Supplement: f1 [file 913435.f1.xls]

## Sheet: Supplymentray data Comparitive 
Experimental, For Solid State		Wave number	Absorbance		Calculated using Gaussian, For Gaseous state		# Infrared Spectrum
		399	85.4				0	0.0273389
		401	81.4				10	0.0575249
		403	85.4				20	0.222262
		405	88.7				30	0.221903
		407	83.9				40	0.839044
		409	85.6				50	0.492038
		411	83.4				60	0.132448
		413	85				70	0.0750827
		415	86.6				80	0.069779
		417	95.7				90	0.0357929
		418	102				100	0.0397186
		420	93.2				110	0.0885212
		422	93				120	0.453323
		424	90				130	0.128008
		426	87				140	0.0408031
		428	85.2				150	0.0245485
		430	85.8				160	0.0255832
		432	85.1				170	0.0619503
		434	82.7				180	0.0288871
		436	89.9				190	0.0369741
		438	93.6				200	0.122789
		440	90.9				210	0.188684
		442	89.4				220	0.101413
		444	88				230	0.140525
		445	90.2				240	0.0667359
		447	89.1				250	0.0528599
		449	87				260	0.158609
		451	87.1				270	0.164155
		453	88.5				280	0.564697
		455	88.3				290	0.152172
		457	88.6				300	0.0619963
		459	89.5				310	0.0961634
		461	90.8				320	0.196962
		463	89.7				330	0.15093
		465	87.2				340	0.314056
		467	87.1				350	0.0794899
		469	84.6				360	0.0511731
		471	82.8				370	0.0568676
		472	82.6				380	0.138081
		474	84				390	0.0883708
		476	85.3				400	0.0824099
		478	87.9				410	0.192896
		480	90				420	0.206135
		482	89.4				430	0.282712
		484	87.2				440	0.141299
		486	85				450	0.149796
		488	85.4				460	0.20929
		490	85.6				470	0.317624
		492	86.1				480	0.560544
		494	84				490	1.27238
		496	82.3				500	4.92982
		498	83				510	14.6829
		499	85.2				520	2.93324
		501	87.7				530	1.62345
		503	87.7				540	0.586632
		505	85.9				550	0.38824
		507	82.6				560	0.289719
		509	77.6				570	0.228279
		511	74				580	0.286678
		513	74.5				590	0.863887
		515	78.8				600	0.759548
		517	79.9				610	0.299776
		519	78.2				620	0.2842
		521	77.5				630	0.405085
		523	77.4				640	0.809676
		525	78.5				650	2.76745
		526	79.3				660	11.5995
		528	78				670	2.13758
		530	77.3				680	0.711757
		532	78				690	0.405197
		534	77.2				700	0.397655
		536	73.7				710	1.07869
		538	71				720	1.39389
		540	70.1				730	0.31269
		542	69.7				740	0.145599
		544	71.2				750	0.0937374
		546	71.4				760	0.0717886
		548	68.5				770	0.0637682
		550	68.7				780	0.068762
		552	70.6				790	0.111084
		553	71.3				800	0.347373
		555	72				810	0.246602
		557	73				820	1.02223
		559	73				830	0.334938
		561	73.6				840	0.106983
		563	73.2				850	0.0634159
		565	72.7				860	0.045213
		567	74.1				870	0.0497278
		569	75.1				880	0.0742651
		571	76				890	0.170131
		573	77				900	0.843144
		575	77.1				910	0.582211
		577	76.3				920	0.152069
		579	76.7				930	0.110846
		580	77.5				940	0.141684
		582	78.8				950	0.385281
		584	80.7				960	0.183583
		586	82.8				970	0.339442
		588	86				980	0.201728
		590	89				990	0.181406
		592	90.9				1000	0.14916
		594	91.8				1010	0.288105
		596	91.5				1020	1.26096
		598	91.3				1030	1.4782
		600	91.6				1040	0.322968
		602	91.8				1050	0.161221
		604	92				1060	0.131745
		606	91.7				1070	0.153391
		607	92.2				1080	0.24628
		609	94.1				1090	0.612002
		611	94.1				1100	3.1208
		613	93.3				1110	2.03572
		615	92				1120	0.505395
		617	92.3				1130	0.262395
		619	92.9				1140	0.213545
		621	90.9				1150	0.28055
		623	90.9				1160	0.437288
		625	91.1				1170	0.99757
		627	89.4				1180	2.36097
		629	87.6				1190	0.954285
		631	86.5				1200	0.717288
		633	85.3				1210	2.13576
		634	83.8				1220	1.92816
		636	82.7				1230	2.22851
		638	80.6				1240	0.74853
		640	77.6				1250	0.666882
		642	76.1				1260	0.944964
		644	77.4				1270	2.00086
		646	80.6				1280	8.6792
		648	82.8				1290	8.6623
		650	84.9				1300	4.68062
		652	87.9				1310	13.0316
		654	90.7				1320	7.14636
		656	92.2				1330	2.14696
		658	92.9				1340	1.49655
		660	94.2				1350	1.89963
		661	94.5				1360	4.49827
		663	93.4				1370	22.9269
		665	93				1380	13.8124
		667	92.5				1390	4.72176
		669	92.1				1400	6.36932
		671	93.4				1410	1.81931
		673	93.3				1420	1.31049
		675	93.2				1430	1.53211
		677	94.1				1440	2.16022
		679	94.3				1450	2.69593
		681	93.2				1460	3.63574
		683	91.7				1470	1.33666
		685	92.4				1480	0.784581
		687	93				1490	0.782731
		688	92.5				1500	1.14594
		690	91.5				1510	3.37619
		692	91.6				1520	2.3812
		694	92.4				1530	3.70976
		696	92.5				1540	8.45383
		698	92.6				1550	22.6996
		700	92.3				1560	21.6829
		702	91.5				1570	49.283
		704	91				1580	12.3353
		706	90.4				1590	3.89906
		708	90.6				1600	1.78061
		710	90.6				1610	1.04097
		712	90.2				1620	0.688284
		714	89.9				1630	0.49076
		715	89.3				1640	0.367971
		717	89.1				1650	0.285981
		719	89.8				1660	0.228204
		721	90.9				1670	0.185708
		723	90.9				1680	0.154997
		725	90.8				1690	0.131356
		727	90.8				1700	0.112763
		729	90.8				1710	0.0978718
		731	90.7				1720	0.0840937
		733	90.9				1730	0.0742534
		735	92.1				1740	0.0648534
		737	94.2				1750	0.055794
		739	94.6				1760	0.0339601
		741	94.6				1770	0.00178126
		742	95.5				1780	0.00160652
		744	95.3				1790	0
		746	94.5				1800	0
		748	93.9				1810	0
		750	93.8				1820	0
		752	93.4				1830	0
		754	92				1840	0
		756	90.4				1850	0
		758	89.1				1860	0
		760	88				1870	0
		762	87.5				1880	0
		764	88.2				1890	0
		766	90.3				1900	0
		768	92.4				1910	0
		769	93.5				1920	0
		771	94				1930	0
		773	95.2				1940	0
		775	95.6				1950	0
		777	95.2				1960	0
		779	94.2				1970	0
		781	94.4				1980	0
		783	95.4				1990	0
		785	95.6				2000	0
		787	96				2010	0
		789	96.3				2020	0
		791	96.2				2030	0
		793	96.5				2040	0
		795	96.8				2050	0
		796	96.6				2060	0
		798	96.5				2070	0
		800	95.9				2080	0
		802	96.2				2090	0
		804	96.9				2100	0
		806	96.8				2110	0
		808	96.2				2120	0
		810	96				2130	0
		812	95				2140	0
		814	92.9				2150	0
		816	91.1				2160	0
		818	87.9				2170	0
		820	85.7				2180	0
		822	87.4				2190	0
		823	91.4				2200	0
		825	94.3				2210	0
		827	95.1				2220	0
		829	95.2				2230	0
		831	95.7				2240	0
		833	95.9				2250	0
		835	96.1				2260	0
		837	96.3				2270	0
		839	96.6				2280	0
		841	96.8				2290	0
		843	96				2300	0
		845	95.6				2310	0
		847	96.5				2320	0
		849	95.8				2330	0
		850	95.3				2340	0
		852	95.8				2350	0
		854	95.6				2360	0
		856	94.6				2370	0
		858	94				2380	0
		860	94				2390	0
		862	94.3				2400	0
		864	94.4				2410	0
		866	94.2				2420	0
		868	93.7				2430	0
		870	93.1				2440	0
		872	92.2				2450	0
		874	91.3				2460	0
		876	89.1				2470	0
		877	85.3				2480	0
		879	80.9				2490	0
		881	79.1				2500	0
		883	81.2				2510	0
		885	86				2520	0
		887	90.5				2530	0
		889	92.7				2540	0
		891	93.5				2550	0
		893	93.3				2560	0
		895	93.4				2570	0
		897	94.7				2580	0
		899	95.7				2590	0
		901	95.9				2600	0
		903	96				2610	0
		904	96.1				2620	0
		906	95.8				2630	0
		908	95.6				2640	0
		910	95.9				2650	0
		912	95.8				2660	0
		914	94.9				2670	0
		916	93.9				2680	0
		918	93.3				2690	0
		920	93.4				2700	0
		922	94.2				2710	0
		924	94.5				2720	0
		926	94.8				2730	0
		928	95				2740	0
		930	94.3				2750	0
		931	93.6				2760	0
		933	93.8				2770	0
		935	95.1				2780	0
		937	95.8				2790	0
		939	95.8				2800	0.00306696
		941	95.4				2810	0.00848899
		943	94.3				2820	0.0164243
		945	93.4				2830	0.02203
		947	93.3				2840	0.0247222
		949	93.6				2850	0.0279416
		951	93.7				2860	0.0318361
		953	93.7				2870	0.0411176
		955	94.4				2880	0.0681413
		957	94.7				2890	0.0900776
		958	94.3				2900	0.105324
		960	93.5				2910	0.123809
		962	93.5				2920	0.148105
		964	93.9				2930	0.181158
		966	94.3				2940	0.228206
		968	94.9				2950	0.299444
		970	95.3				2960	0.417359
		972	95.3				2970	0.641668
		974	94.8				2980	1.1874
		976	94.6				2990	3.42532
		978	95.4				3000	10.5589
		980	95.7				3010	13.8106
		982	95.3				3020	5.75754
		984	95.1				3030	6.14568
		985	95.1				3040	2.42263
		987	95.8				3050	2.86709
		989	96				3060	8.16016
		991	95.3				3070	20.4972
		993	94.9				3080	23.8637
		995	94.6				3090	17.4818
		997	94.4				3100	5.33252
		999	94.8				3110	1.87187
		1000	94.9				3120	0.990022
		1000	94.3				3130	0.628454
		1000	94.4				3140	0.43935
		1010	94.1				3150	0.326504
		1010	93.6				3160	0.253199
		1010	93.3				3170	0.202641
		1010	93.3				3180	0.166172
		1010	92.9				3190	0.138934
		1020	92.7				3200	0.115135
		1020	93				3210	0.0944852
		1020	93.2				3220	0.0760943
		1020	92.1				3230	0.0629554
		1020	90.8				3240	0.0553595
		1030	90.4				3250	0.0490624
		1030	90.2				3260	0.0437835
		1030	89.7				3270	0.0352991
		1030	89.2				3280	0.0131535
		1030	88.2				3290	0.000945446
		1040	86.8				3300	0
		1040	86.1				3310	0
		1040	85.6				3320	0
		1040	85				3330	0
		1040	84.7				3340	0
		1050	85.2				3350	0
		1050	86.3				3360	0
		1050	87.7				3370	0
		1050	88.6				3380	0.00117182
		1050	88.3				3390	0.00236285
		1050	87.6				3400	0.00263532
		1060	86.7				3410	0.00295779
		1060	85.5				3420	0.00334328
		1060	83.7				3430	0.00380936
		1060	81.6				3440	0.00438018
		1060	80.1				3450	0.00508963
		1070	78.9				3460	0.00598653
		1070	78.8				3470	0.00714325
		1070	79.6				3480	0.00867081
		1070	80.5				3490	0.0107465
		1070	80.8				3500	0.0136678
		1080	81.2				3510	0.0179653
		1080	82.7				3520	0.024662
		1080	84.9				3530	0.0359437
		1080	86.7				3540	0.057197
		1080	88.8				3550	0.104848
		1090	90.6				3560	0.250253
		1090	91.4				3570	1.07586
		1090	92.1				3580	2.34336
		1090	92.4				3590	0.608039
		1090	92.8				3600	0.18001
		1100	93.3				3610	0.084011
		1100	94.1				3620	0.0484307
		1100	94.4				3630	0.0314636
		1100	94.3				3640	0.0220725
		1100	93.9				3650	0.0163358
		1110	93.4				3660	0.0125767
		1110	93.4				3670	0.00998046
		1110	93.2				3680	0.00811252
		1110	93				3690	0.00672389
		1110	92.9				3700	0.00566356
		1110	92.3				3710	0.00483563
		1120	92				3720	0.00417684
		1120	91.4				3730	0.00364405
		1120	90.9				3740	0.00320708
		1120	90.7				3750	0.00284424
		1120	90.6				3760	0.00253967
		1130	89.8				3770	0.00228152
		1130	88.9				3780	0.000993411
		1130	88.4				3790	0
		1130	88.4				3800	0
		1130	88.9				3810	0
		1140	89.6				3820	0
		1140	89.7				3830	0
		1140	89.3				3840	0
		1140	88.8				3850	0
		1140	88.1				3860	0
		1150	86.7				3870	0
		1150	85				3880	0
		1150	84.3				3890	0
		1150	84.5				3900	0
		1150	85.2				3910	0
		1160	85.5				3920	0
		1160	84.5				3930	0
		1160	82.7				3940	0
		1160	80.3				3950	0
		1160	77.9				3960	0
		1160	77				3970	0
		1170	78.6				3980	0
		1170	81.5				3990	0
		1170	83.4				3980.0000000000 0.0000000000 0.0000000000
		1170	84.3				3990.0000000000 0.0000000000 0.0000000000
		1170	84.7
		1180	85.7
		1180	86.8
		1180	87.4
		1180	87.7
		1180	87.3
		1190	86.8
		1190	85.9
		1190	84.6
		1190	83.5
		1190	82.1
		1200	80.5
		1200	79.2
		1200	77.8
		1200	76.7
		1200	75.7
		1210	75
		1210	74.5
		1210	73.7
		1210	72.9
		1210	71.8
		1210	70.1
		1220	68.3
		1220	68.2
		1220	68.8
		1220	68
		1220	66.4
		1230	65.5
		1230	65.7
		1230	67.3
		1230	70
		1230	73.3
		1240	76.9
		1240	80.4
		1240	83.1
		1240	85.2
		1240	86.8
		1250	88
		1250	88.6
		1250	88.9
		1250	89.1
		1250	88.9
		1260	88.2
		1260	87.1
		1260	86.2
		1260	86
		1260	86.7
		1270	87.7
		1270	88.8
		1270	89.6
		1270	90.2
		1270	91
		1270	91.2
		1280	90.8
		1280	90.8
		1280	90.3
		1280	89.1
		1280	87.5
		1290	85.5
		1290	83.4
		1290	83.2
		1290	84.9
		1290	86.4
		1300	86.5
		1300	85.4
		1300	84
		1300	82.9
		1300	81.9
		1310	80.8
		1310	79.8
		1310	79.1
		1310	78.8
		1310	80.2
		1320	82.8
		1320	84.9
		1320	86.3
		1320	87.4
		1320	87.7
		1320	87.4
		1330	86.8
		1330	85.8
		1330	84.5
		1330	83
		1330	81.6
		1340	80.9
		1340	81.1
		1340	82.9
		1340	85
		1340	85.6
		1350	85.1
		1350	83.8
		1350	82.8
		1350	82.6
		1350	83
		1360	83.9
		1360	85.1
		1360	84.9
		1360	83.5
		1360	81.5
		1370	79.3
		1370	78.1
		1370	78.5
		1370	79.8
		1370	80.4
		1380	81
		1380	81.9
		1380	81.9
		1380	81.9
		1380	81.7
		1380	81.2
		1390	81.6
		1390	85.3
		1390	87.8
		1390	88.5
		1390	88.5
		1400	89
		1400	89.4
		1400	90
		1400	89.9
		1400	88.5
		1410	87.7
		1410	87.6
		1410	87.7
		1410	88.8
		1410	90.1
		1420	90.3
		1420	89.5
		1420	89.8
		1420	90.9
		1420	90.6
		1430	90.5
		1430	89.8
		1430	87.7
		1430	85.8
		1430	85
		1430	84.3
		1440	85.4
		1440	87.8
		1440	88.2
		1440	87.4
		1440	85.8
		1450	84.6
		1450	84.9
		1450	85.4
		1450	84.3
		1450	82.2
		1460	79.1
		1460	78.3
		1460	78.8
		1460	78
		1460	77
		1470	77.6
		1470	78.7
		1470	79.9
		1470	80.7
		1470	84.6
		1480	88.1
		1480	90.7
		1480	91.7
		1480	91.6
		1480	91.9
		1480	91.2
		1490	89.1
		1490	87
		1490	87.9
		1490	89
		1490	87.8
		1500	85.6
		1500	84.3
		1500	83.5
		1500	82.2
		1500	79.9
		1510	74.4
		1510	70.5
		1510	70.4
		1510	69.1
		1510	67.6
		1520	66.6
		1520	68.7
		1520	70.4
		1520	73.5
		1520	77.1
		1530	78.8
		1530	80.7
		1530	82.4
		1530	82.1
		1530	80.5
		1540	79.8
		1540	78.4
		1540	74.3
		1540	71.3
		1540	71.5
		1540	71
		1550	70.4
		1550	68.4
		1550	66.6
		1550	65.1
		1550	63.7
		1560	62.6
		1560	60.8
		1560	64.6
		1560	66
		1560	67.5
		1570	71
		1570	73.3
		1570	79
		1570	84.6
		1570	86.8
		1580	87.9
		1580	91.3
		1580	93.5
		1580	94.8
		1580	95.6
		1590	96.4
		1590	96.5
		1590	96.6
		1590	97.1
		1590	97.6
		1590	97.5
		1600	97.8
		1600	98
		1600	98.1
		1600	98.1
		1600	98.3
		1610	97.9
		1610	97.9
		1610	98.3
		1610	98.6
		1610	98
		1620	97.2
		1620	97.8
		1620	98.1
		1620	97.1
		1620	97.2
		1630	98.1
		1630	98.2
		1630	98.9
		1630	98.9
		1630	97.6
		1640	95.9
		1640	96.7
		1640	97.8
		1640	98.3
		1640	97.9
		1650	96.3
		1650	94.4
		1650	96.2
		1650	96.2
		1650	93
		1650	96.1
		1660	98.3
		1660	99.2
		1660	98.8
		1660	98
		1660	98.8
		1670	98.6
		1670	96.7
		1670	95.7
		1670	97
		1670	97.3
		1680	97.5
		1680	97.9
		1680	96.9
		1680	95.9
		1680	93.6
		1690	95.7
		1690	96.8
		1690	97.2
		1690	97.9
		1690	97.6
		1700	95.4
		1700	94
		1700	93.6
		1700	94.6
		1700	95.2
		1700	94.6
		1710	94.6
		1710	94.4
		1710	93.5
		1710	92.3
		1710	89.6
		1720	86.9
		1720	87.2
		1720	89.2
		1720	89.3
		1720	88.8
		1730	88.4
		1730	87.6
		1730	87.2
		1730	86.2
		1730	83.2
		1740	83.8
		1740	84.2
		1740	83.9
		1740	84.5
		1740	84.8
		1750	85.6
		1750	85.4
		1750	84.9
		1750	86.4
		1750	88.6
		1750	89.3
		1760	89.7
		1760	90.7
		1760	90.9
		1760	91.9
		1760	93.6
		1770	94
		1770	94
		1770	93.8
		1770	94.1
		1770	95.5
		1780	96.3
		1780	96.4
		1780	95.9
		1780	96.5
		1780	97.1
		1790	97.7
		1790	97.8
		1790	96.7
		1790	95.5
		1790	96.8
		1800	97.7
		1800	98.1
		1800	97.8
		1800	97.7
		1800	98.8
		1810	99.2
		1810	98.8
		1810	98.4
		1810	98.1
		1810	98.6
		1810	99.2
		1820	99.3
		1820	99.5
		1820	99.4
		1820	99.1
		1820	98.9
		1830	98.6
		1830	98.3
		1830	98.9
		1830	99.7
		1830	99
		1840	98.8
		1840	99
		1840	98.9
		1840	98.1
		1840	96.7
		1850	97.6
		1850	98.6
		1850	99.6
		1850	100
		1850	99.8
		1860	100
		1860	100
		1860	99.8
		1860	99.2
		1860	99.5
		1860	99.1
		1870	98.6
		1870	99
		1870	98.7
		1870	98.2
		1870	98.3
		1880	99.6
		1880	100
		1880	98.8
		1880	99.3
		1880	99.6
		1890	99.1
		1890	99.5
		1890	100
		1890	101
		1890	100
		1900	99.3
		1900	100
		1900	101
		1900	100
		1900	99.7
		1910	98.6
		1910	98.3
		1910	98.1
		1910	98.8
		1910	99.7
		1910	99.4
		1920	97.9
		1920	98.3
		1920	99.5
		1920	98.7
		1920	100
		1930	101
		1930	102
		1930	102
		1930	101
		1930	102
		1940	102
		1940	99.8
		1940	98.1
		1940	99.7
		1940	101
		1950	101
		1950	102
		1950	100
		1950	99.7
		1950	99
		1960	99.4
		1960	101
		1960	101
		1960	100
		1960	98
		1970	95.7
		1970	95.2
		1970	99.7
		1970	103
		1970	101
		1970	102
		1980	102
		1980	102
		1980	100
		1980	95.7
		1980	99.2
		1990	99.4
		1990	96.3
		1990	97
		1990	101
		1990	103
		2000	103
		2000	99.3
		2000	97.3
		2000	99.2
		2000	100
		2010	99.8
		2010	101
		2010	100
		2010	102
		2010	107
		2020	103
		2020	98.4
		2020	99.6
		2020	101
		2020	101
		2020	104
		2030	104
		2030	100
		2030	97.3
		2030	98.2
		2030	99.3
		2040	103
		2040	103
		2040	99.2
		2040	100
		2040	106
		2050	107
		2050	104
		2050	98.4
		2050	99.1
		2050	101
		2060	101
		2060	100
		2060	99.3
		2060	98.7
		2060	99.6
		2070	101
		2070	101
		2070	97.7
		2070	96.6
		2070	99.2
		2080	100
		2080	101
		2080	101
		2080	99.9
		2080	100
		2080	99.7
		2090	101
		2090	101
		2090	99.5
		2090	98.6
		2090	99.6
		2100	101
		2100	99.8
		2100	98.7
		2100	99.9
		2100	101
		2110	101
		2110	101
		2110	102
		2110	102
		2110	100
		2120	99.4
		2120	99.1
		2120	99.1
		2120	99.2
		2120	99.6
		2130	99.5
		2130	98.4
		2130	102
		2130	103
		2130	101
		2130	98.7
		2140	99
		2140	101
		2140	99
		2140	100
		2140	102
		2150	102
		2150	102
		2150	99.6
		2150	101
		2150	104
		2160	104
		2160	102
		2160	97.9
		2160	98.3
		2160	101
		2170	104
		2170	105
		2170	102
		2170	99
		2170	100
		2180	104
		2180	102
		2180	100
		2180	99.8
		2180	106
		2180	104
		2190	100
		2190	102
		2190	100
		2190	96.9
		2190	98.9
		2200	103
		2200	103
		2200	98
		2200	94.5
		2200	96
		2210	102
		2210	102
		2210	100
		2210	99.7
		2210	98.5
		2220	97.4
		2220	99.7
		2220	102
		2220	101
		2220	97.3
		2230	99
		2230	100
		2230	102
		2230	102
		2230	99.5
		2240	97.7
		2240	97.7
		2240	98.6
		2240	99.1
		2240	99.5
		2240	99.3
		2250	98.7
		2250	99.2
		2250	101
		2250	99.6
		2250	98.9
		2260	99
		2260	99.6
		2260	100
		2260	99.8
		2260	99.8
		2270	99.2
		2270	100
		2270	101
		2270	101
		2270	100
		2280	100
		2280	99.8
		2280	99.7
		2280	100
		2280	99.2
		2290	99.1
		2290	99.2
		2290	99.2
		2290	98.6
		2290	98.6
		2290	98.9
		2300	98.4
		2300	98
		2300	99.1
		2300	99.9
		2300	98.5
		2310	97.6
		2310	98.4
		2310	97.9
		2310	97.5
		2310	98.2
		2320	97.7
		2320	96.4
		2320	95.7
		2320	96.6
		2320	97.3
		2330	97.9
		2330	98.5
		2330	98.2
		2330	98.4
		2330	98.8
		2340	99
		2340	98.7
		2340	97.6
		2340	98.5
		2340	98.9
		2350	96.2
		2350	95.7
		2350	96.3
		2350	96.3
		2350	96.4
		2350	96.9
		2360	97
		2360	98
		2360	97.9
		2360	96.6
		2360	97.4
		2370	97.8
		2370	98.2
		2370	98.4
		2370	98.2
		2370	97.5
		2380	97.2
		2380	97.3
		2380	98.1
		2380	98.3
		2380	98.7
		2390	99
		2390	99
		2390	99.3
		2390	99.5
		2390	100
		2400	101
		2400	100
		2400	99.6
		2400	99.1
		2400	99.2
		2400	99.9
		2410	99.9
		2410	99.8
		2410	99.7
		2410	99.6
		2410	99.9
		2420	100
		2420	101
		2420	100
		2420	101
		2420	101
		2430	100
		2430	101
		2430	100
		2430	100
		2430	99.8
		2440	99.5
		2440	99.4
		2440	99.5
		2440	100
		2440	101
		2450	101
		2450	100
		2450	101
		2450	101
		2450	100
		2450	101
		2460	101
		2460	99.9
		2460	99.7
		2460	100
		2460	101
		2470	99.8
		2470	99.2
		2470	99.5
		2470	99.9
		2470	100
		2480	99.4
		2480	99.1
		2480	98.4
		2480	98.4
		2480	99.9
		2490	100
		2490	99.1
		2490	98.6
		2490	99.8
		2490	99.8
		2500	99.4
		2500	99
		2500	99.2
		2500	100
		2500	100
		2510	99.9
		2510	99.5
		2510	99.4
		2510	99.4
		2510	99.3
		2510	99.3
		2520	99.6
		2520	99.5
		2520	99.4
		2520	99.5
		2520	99.4
		2530	99.7
		2530	100
		2530	101
		2530	100
		2530	101
		2540	101
		2540	99.5
		2540	99
		2540	98.8
		2540	99.1
		2550	100
		2550	99.9
		2550	99
		2550	98.5
		2550	98.9
		2560	98.9
		2560	98.3
		2560	99.3
		2560	100
		2560	99.4
		2560	98.5
		2570	98.5
		2570	98.5
		2570	98.4
		2570	99
		2570	99.3
		2580	98.7
		2580	99.1
		2580	99.8
		2580	99.5
		2580	99.1
		2590	99.1
		2590	99.4
		2590	98.8
		2590	98.9
		2590	99
		2600	98.9
		2600	98.8
		2600	99.3
		2600	99.4
		2600	98.9
		2610	99.1
		2610	99.3
		2610	99.4
		2610	99.4
		2610	99.3
		2620	99.1
		2620	99.1
		2620	99.7
		2620	99.7
		2620	98.8
		2620	98.6
		2630	99
		2630	99
		2630	99.1
		2630	99
		2630	98.6
		2640	98.5
		2640	98.5
		2640	98.7
		2640	99.2
		2640	99.4
		2650	99.3
		2650	99
		2650	98.8
		2650	98.9
		2650	98.8
		2660	98.7
		2660	98.7
		2660	98.8
		2660	99
		2660	99
		2670	99.1
		2670	99
		2670	98.6
		2670	98.6
		2670	98.8
		2670	98.5
		2680	98.3
		2680	98.5
		2680	98.7
		2680	98.7
		2680	98.7
		2690	98.6
		2690	98.6
		2690	98.5
		2690	98.7
		2690	98.7
		2700	98.5
		2700	98.5
		2700	98.4
		2700	98.3
		2700	98.5
		2710	98.7
		2710	98.6
		2710	98.4
		2710	98.4
		2710	98.3
		2720	98.2
		2720	98.1
		2720	98.2
		2720	98.3
		2720	98.2
		2720	98.1
		2730	98.1
		2730	98.3
		2730	98.6
		2730	98.6
		2730	98.5
		2740	98.5
		2740	98.3
		2740	98.1
		2740	98
		2740	97.9
		2750	98
		2750	98.2
		2750	98.5
		2750	98.3
		2750	98
		2760	98.3
		2760	98.2
		2760	97.8
		2760	97.8
		2760	98.3
		2770	98.4
		2770	98.3
		2770	98.2
		2770	98.1
		2770	98.1
		2780	98
		2780	97.9
		2780	98.1
		2780	98
		2780	98.1
		2780	98.1
		2790	97.8
		2790	97.6
		2790	97.7
		2790	97.9
		2790	98
		2800	97.8
		2800	97.7
		2800	97.5
		2800	97.2
		2800	97.3
		2810	97.5
		2810	97.2
		2810	96.9
		2810	97.1
		2810	97.5
		2820	97.4
		2820	97.1
		2820	97
		2820	97
		2820	96.9
		2830	96.9
		2830	96.6
		2830	96.3
		2830	96.2
		2830	96.2
		2830	96.2
		2840	96.1
		2840	95.7
		2840	95.8
		2840	95.7
		2840	95.4
		2850	95.1
		2850	94.9
		2850	94.5
		2850	93.9
		2850	93.6
		2860	93.4
		2860	93.1
		2860	92.2
		2860	91.1
		2860	90.5
		2870	90.1
		2870	89.7
		2870	89.8
		2870	90.2
		2870	90.9
		2880	92
		2880	92.5
		2880	92.8
		2880	93.3
		2880	93.3
		2890	93
		2890	92.8
		2890	92.7
		2890	92.7
		2890	92.8
		2890	92.1
		2900	91.3
		2900	91.4
		2900	91.5
		2900	91.5
		2900	91
		2910	90.1
		2910	89.7
		2910	89.4
		2910	89
		2910	89.3
		2920	89.5
		2920	89.1
		2920	89.1
		2920	89.4
		2920	89.6
		2930	89.6
		2930	89.7
		2930	89.5
		2930	89.2
		2930	89.1
		2940	88.9
		2940	89.1
		2940	89.4
		2940	89.4
		2940	88.9
		2940	87.8
		2950	86.1
		2950	84.5
		2950	83.1
		2950	81.8
		2950	81
		2960	81.3
		2960	82
		2960	82.9
		2960	84.9
		2960	87.1
		2970	89.1
		2970	90.5
		2970	90.6
		2970	91.1
		2970	92.1
		2980	93.1
		2980	94.3
		2980	95.1
		2980	95.8
		2980	96.2
		2990	96.1
		2990	96.2
		2990	96.5
		2990	96.3
		2990	95.9
		2990	95.7
		3000	95.6
		3000	95.5
		3000	95.3
		3000	95.3
		3000	95.7
		3010	95.5
		3010	94.6
		3010	93.8
		3010	93.9
		3010	93.8
		3020	93.7
		3020	94.2
		3020	94.2
		3020	94.3
		3020	94.6
		3030	95.4
		3030	96.1
		3030	96.1
		3030	96.2
		3030	96.3
		3040	96.5
		3040	97
		3040	97.2
		3040	97.3
		3040	97.6
		3050	97.8
		3050	97.8
		3050	97.6
		3050	97.6
		3050	97.7
		3050	97.8
		3060	97.4
		3060	97.3
		3060	97.3
		3060	96.4
		3060	96
		3070	96.6
		3070	96.9
		3070	96.9
		3070	96.7
		3070	96.6
		3080	96.8
		3080	97.4
		3080	97.3
		3080	97.3
		3080	97.4
		3090	97.3
		3090	97.1
		3090	97.1
		3090	97.1
		3090	97.2
		3100	97.2
		3100	96.9
		3100	96.8
		3100	97.1
		3100	97.5
		3100	97.7
		3110	97.5
		3110	97
		3110	96.9
		3110	96.8
		3110	96.8
		3120	96.9
		3120	96.9
		3120	97
		3120	96.9
		3120	96.9
		3130	97.1
		3130	97
		3130	96.9
		3130	96.8
		3130	96.8
		3140	96.8
		3140	96.8
		3140	96.6
		3140	96.7
		3140	96.5
		3150	95.9
		3150	95.5
		3150	95.4
		3150	95.3
		3150	95.6
		3160	95.8
		3160	95.4
		3160	95.9
		3160	96.4
		3160	95.9
		3160	94.9
		3170	94.7
		3170	94.6
		3170	94.8
		3170	95.2
		3170	94.9
		3180	94.4
		3180	94.4
		3180	94.2
		3180	93.9
		3180	94.2
		3190	94.1
		3190	94
		3190	93.7
		3190	93.1
		3190	92.8
		3200	92.5
		3200	92.2
		3200	92.3
		3200	91.9
		3200	91
		3210	91.3
		3210	91
		3210	89.9
		3210	88.8
		3210	87.9
		3210	87.8
		3220	87.5
		3220	86.9
		3220	86.3
		3220	85.9
		3220	86.1
		3230	85.6
		3230	84.7
		3230	84.8
		3230	84.9
		3230	84.4
		3240	84.1
		3240	83.9
		3240	84.2
		3240	85.1
		3240	85.8
		3250	86.5
		3250	87.3
		3250	88
		3250	88.4
		3250	88.9
		3260	90
		3260	90.9
		3260	91.7
		3260	92.4
		3260	93.1
		3260	93.5
		3270	93.9
		3270	94.7
		3270	94.9
		3270	94.8
		3270	95.3
		3280	95.8
		3280	95.8
		3280	95.7
		3280	95.6
		3280	95.5
		3290	95.4
		3290	95.4
		3290	95.4
		3290	95.5
		3290	94.8
		3300	94.1
		3300	94.3
		3300	94.7
		3300	95
		3300	95.2
		3310	95.5
		3310	95.1
		3310	94.7
		3310	94.4
		3310	94.3
		3320	94.2
		3320	94.1
		3320	93.5
		3320	92.8
		3320	92.3
		3320	92.4
		3330	92
		3330	91.6
		3330	90.9
		3330	90.1
		3330	90.4
		3340	90.6
		3340	90.4
		3340	89.9
		3340	90.1
		3340	90.1
		3350	89.7
		3350	89.8
		3350	90.8
		3350	91.8
		3350	92.1
		3360	92.8
		3360	93.6
		3360	94.8
		3360	95.6
		3360	95.9
		3370	95.9
		3370	96.2
		3370	97
		3370	97.8
		3370	98
		3370	98
		3380	97.9
		3380	97.9
		3380	98.4
		3380	98.7
		3380	99.3
		3390	99.1
		3390	98.5
		3390	98.9
		3390	99.2
		3390	98.8
		3400	98.2
		3400	98.5
		3400	98.7
		3400	98.3
		3400	98.7
		3410	99.4
		3410	99.8
		3410	99.9
		3410	100
		3410	99.6
		3420	99.3
		3420	99.3
		3420	98.5
		3420	98.2
		3420	98.5
		3430	98.9
		3430	98.9
		3430	98.9
		3430	99.1
		3430	98.8
		3430	98.7
		3440	99.4
		3440	100
		3440	99.7
		3440	99.5
		3440	99.1
		3450	98.1
		3450	98.5
		3450	99.3
		3450	99
		3450	98.8
		3460	98.7
		3460	99
		3460	99.4
		3460	99.9
		3460	100
		3470	99.5
		3470	99.8
		3470	99.7
		3470	99
		3470	98.9
		3480	99.3
		3480	99.4
		3480	99.2
		3480	99.2
		3480	99.7
		3480	99.7
		3490	99.5
		3490	99.6
		3490	99.7
		3490	99.9
		3490	100
		3500	99.1
		3500	98.5
		3500	98
		3500	97.6
		3500	98.5
		3510	99.5
		3510	99.6
		3510	99.6
		3510	99.2
		3510	99.5
		3520	99.8
		3520	99
		3520	98.2
		3520	98.2
		3520	97.3
		3530	97.8
		3530	98.9
		3530	98.5
		3530	98.1
		3530	98.5
		3530	98.5
		3540	98.4
		3540	99
		3540	98.6
		3540	97.7
		3540	97.7
		3550	98.4
		3550	99.3
		3550	98.9
		3550	98.1
		3550	98.6
		3560	98.9
		3560	98.7
		3560	98.1
		3560	97.7
		3560	97.8
		3570	96.8
		3570	97
		3570	97.7
		3570	98.3
		3570	98.8
		3580	99.2
		3580	99.2
		3580	99.1
		3580	98.9
		3580	98.4
		3590	97.2
		3590	96.9
		3590	98.3
		3590	98.7
		3590	97.4
		3590	96.8
		3600	96.5
		3600	96.6
		3600	97.2
		3600	97.8
		3600	98
		3610	97.2
		3610	96.7
		3610	97.4
		3610	96.8
		3610	96.6
		3620	97.4
		3620	97.2
		3620	97.4
		3620	97.6
		3620	97.6
		3630	97
		3630	94.8
		3630	94.7
		3630	97.2
		3630	97.6
		3640	98.1
		3640	99.2
		3640	99.8
		3640	98
		3640	96.4
		3640	96.3
		3650	93.9
		3650	92
		3650	94.4
		3650	96.9
		3650	97.3
		3660	97.1
		3660	98
		3660	98.4
		3660	98.6
		3660	98.7
		3670	97.8
		3670	95.2
		3670	95
		3670	96.3
		3670	95.6
		3680	94.6
		3680	96.1
		3680	98.2
		3680	99.5
		3680	99
		3690	97.4
		3690	95.7
		3690	95.7
		3690	97.1
		3690	98.1
		3700	98.5
		3700	98.9
		3700	98.8
		3700	98.8
		3700	98.8
		3700	98.9
		3710	98.7
		3710	97.9
		3710	96.2
		3710	95.7
		3710	96.7
		3720	98.3
		3720	98.6
		3720	97
		3720	95
		3720	95.3
		3730	95.8
		3730	96.3
		3730	95.9
		3730	94.1
		3730	91.6
		3740	92
		3740	95.6
		3740	96
		3740	95.2
		3740	93.6
		3750	94.5
		3750	95.8
		3750	95.9
		3750	95.1
		3750	96.4
		3750	97.4
		3760	97.3
		3760	97.1
		3760	97.9
		3760	98.5
		3760	98.4
		3770	97.8
		3770	97.1
		3770	97.6
		3770	98.7
		3770	99.2
		3780	99.2
		3780	98.4
		3780	98.1
		3780	98.4
		3780	97.9
		3790	98.3
		3790	99.1
		3790	98.6
		3790	98.8
		3790	99
		3800	97.8
		3800	96.8
		3800	96.8
		3800	95.8
		3800	95.8
		3800	96.1
		3810	96.7
		3810	98
		3810	98.7
		3810	98.1
		3810	96.1
		3820	95
		3820	95.6
		3820	95.2
		3820	96.4
		3820	97.5
		3830	97.3
		3830	97.4
		3830	97.2
		3830	96.8
		3830	96.6
		3840	95.9
		3840	95.7
		3840	95.8
		3840	96.1
		3840	97.6
		3850	98.9
		3850	98.6
		3850	97.4
		3850	95.6
		3850	93.7
		3860	96.2
		3860	96.6
		3860	97.6
		3860	97.7
		3860	96.8
		3860	96.9
		3870	96.4
		3870	94.7
		3870	95.7
		3870	96.2
		3870	97.2
		3880	98.9
		3880	98
		3880	95.9
		3880	95.7
		3880	96.2
		3890	97.3
		3890	98.1
		3890	97.2
		3890	97.1
		3890	98.2
		3900	98.3
		3900	96.6
		3900	95.9
		3900	95.6
		3900	95.5
		3910	96.8
		3910	97.9
		3910	98.7
		3910	99.1
		3910	98.7
		3910	98.4
		3920	98.2
		3920	98.4
		3920	98.3
		3920	97.9
		3920	97.9
		3930	98.1
		3930	97.2
		3930	96.7
		3930	96.5
		3930	97
		3940	97.9
		3940	98.1
		3940	97.8
		3940	97.5
		3940	97.4
		3950	97.5
		3950	97.2
		3950	97.3
		3950	97.9
		3950	98.7
		3960	99
		3960	98.6
		3960	98.2
		3960	98.5
		3960	98.8
		3960	98.3
		3970	98.3
		3970	98.2
		3970	98.1
		3970	98.6
		3970	98.7
		3980	99.1
		3980	98.8
		3980	98.8
		3980	99.3
		3980	99.4
		3990	99.1
		3990	98.4
		3990	98.1
		3990	98.5
		3990	98.2
		4000	98.2
		4000	98.2
		4000	98.5
